# Supplementary material for: Comparison of Early Warning Scoring Systems for Hospitalized Patients With and Without Infection at Risk for In-Hospital Mortality and Transfer to the Intensive Care Unit
Source: PubMed Central journal article supplement (PMC7237982; doi:10.1001/jamanetworkopen.2020.5191), 2020-05-19
Supplement: jamanetwopen-3-e205191-s001.pdf [file jamanetwopen-3-e205191-s001.pdf]

## Supplementary Online Content

Liu VX, Lu Y, Carey KA, et al. Comparison of early warning scoring systems for hospitalized patients with and without infection at risk for in-hospital mortality and transfer to the intensive care unit. *JAMA Netw Open*. 2020;3(5):e205191.  
doi:10.1001/jamanetworkopen.2020.5191

**eTable 1.** Data Elements and Points Associated With Each of the Five Risk Scores Included in This Study

**eTable 2.** Missingness Rates of Data Elements for Calculating Risk Scores Between California and Illinois Hospitals

**eTable 3.** Median and Interquartile Range Values for Maximum Risk Score Values During the Time-at-Risk Interval, Stratified by Region and Suspected Infection

This supplementary material has been provided by the authors to give readers additional information about their work.

**eTable 1. Data elements and points associated with each of the five risk scores included in this study.**

| <b>NEWS</b><br>(score range:<br>0-20)  | <b>MEWS</b><br>(score range:<br>0-14) | <b>BTF*</b><br>(score range:<br>Yellow or red) | <b>SIRS</b><br>(score range:<br>0-4) | <b>qSOFA</b><br>(score range:<br>0-3) |
|----------------------------------------|---------------------------------------|------------------------------------------------|--------------------------------------|---------------------------------------|
| <b>RR</b><br>(0-3)                     | <b>RR</b><br>(0-3)                    | <b>RR</b><br>(yellow/red)                      | <b>RR</b><br>(0 or 1)                | <b>RR</b><br>(0 or 1)                 |
| <b>Temp (°C)</b><br>(0-3)              | <b>Temp (°C)</b><br>(0-2)             | <b>Temp (°C)</b><br>(yellow/red)               | <b>Temp (°C)</b><br>(0 or 1)         |                                       |
| <b>Systolic BP</b><br>(0-3)            | <b>Systolic BP</b><br>(0-3)           | <b>Systolic BP</b><br>(yellow/red)             |                                      | <b>Systolic BP</b><br>(0 or 1)        |
| <b>HR</b><br>(0-3)                     | <b>HR</b><br>(0-3)                    | <b>HR</b><br>(yellow/red)                      | <b>HR</b><br>(0 or 1)                |                                       |
| <b>AVPU</b><br>(0 or 3)                | <b>AVPU</b><br>(0-3)                  | <b>AVPU</b><br>(yellow/red)                    |                                      | <b>GCS</b><br>(0 or 1)                |
| <b>SpO2 (%)</b><br>(0-3)               |                                       | <b>SpO2 (%)</b><br>(yellow/red)                |                                      |                                       |
| <b>Supplemental oxygen</b><br>(0 or 2) |                                       |                                                |                                      |                                       |
|                                        |                                       |                                                | <b>WBC</b><br>(0 or 1)               |                                       |

\*any parameter may qualify the patient to be in yellow or red zone and is a binary score

NEWS = National Early Warning Score; MEWS = Modified Early Warning Score; BTF = Between the Flages; SIRS = Systemic Inflammatory Respones Syndrome; qSOFA = quick Sequential Organ Failure Assessment; RR = respiratory rate (breaths); SpO2 = peripheral capillary oxygen saturation percentage; Temp (celcius) = temperature; BP = blood pressure (mmHg); AVPU = alert, voice, pain, unresponsive; GCS = Glasgow coma scale; WBC = white blood cell count (mm<sup>3</sup>); BUN = blood urea nitrogen (mg/dL or mmol/L)

**eTable 2. Missingness rates of data elements for calculating risk scores between California and Illinois hospitals.**

| <b>Variable</b>          | <b>California hospitals</b> | <b>Illinois hospitals</b> |
|--------------------------|-----------------------------|---------------------------|
| Heart rate               | 910 (0%)                    | 1,593 (0%)                |
| Respiratory rate         | 1,347 (0%)                  | 1,630 (0%)                |
| Systolic blood pressure  | 977 (0%)                    | 1,817 (0%)                |
| Diastolic blood pressure | 977 (0%)                    | 1,830 (0%)                |
| Oxygen saturation        | 1328 (0%)                   | 8,523 (1%)                |
| Temperature              | 4,491 (0%)                  | 3,924 (1%)                |
| Neurologic evaluation*   | 460,274 (47%)               | 22,449 (3%)               |
| Glasgow coma score       | 460,481 (47%)               | 289,614 (41%)             |
| Band forms               | 855,150 (87%)               | 297,666 (42%)             |
| Blood urea nitrogen      | 108,824 (11%)               | 85,010 (12%)              |
| White blood cell count   | 69,929 (7%)                 | 63,405 (9%)               |

\* Neurologic evaluation in California hospitals based on identification of only abnormal neurologic status based on flowsheet documentation from electronic health record data, as described in *Escobar GJ, Gardner MN, Greene JD, Draper D, Kipnis P. Risk-adjusting hospital mortality using a comprehensive electronic record in an integrated health care delivery system. Medical Care 2013; 6(2): 74-80.*

**eTable 3. Median and interquartile range values for maximum risk score values during the time-at-risk interval, stratified by region and suspected infection.**

|                          | <b>California hospitals</b><br>(n = 752,130) |           | <b>Illinois hospitals</b><br>(n = 713,786) |           |
|--------------------------|----------------------------------------------|-----------|--------------------------------------------|-----------|
|                          | <b>Suspected Infection</b>                   |           |                                            |           |
|                          | <b>Yes</b>                                   | <b>No</b> | <b>Yes</b>                                 | <b>No</b> |
| <b>General</b>           |                                              |           |                                            |           |
| NEWS                     | 6 (4 – 8)                                    | 5 (3 – 6) | 6 (4 – 8)                                  | 4 (3 – 6) |
| MEWS                     | 3 (2 – 4)                                    | 2 (1 – 3) | 3 (2 – 5)                                  | 2 (2 – 3) |
| BTF                      | 2 (1 – 2)                                    | 1 (1 – 2) | 2 (1 – 2)                                  | 1 (1 – 2) |
|                          |                                              |           |                                            |           |
| <b>Infection-related</b> |                                              |           |                                            |           |
| qSOFA                    | 1 (1 – 2)                                    | 1 (0 – 1) | 1 (1 – 1)                                  | 1 (0 – 1) |
| SIRS                     | 2 (1 – 3)                                    | 1 (1 – 2) | 2 (1 – 3)                                  | 1 (1 – 2) |

Abbreviations: NEWS: National Early Warning Score; MEWS: Modified Early Warning Score; BTF: Between the Flags; qSOFA: quick Sepsis-related Organ Failure Assessment; SIRS: Systemic Inflammatory Response Syndrome
